# Supplementary material
Source: PubMed Central journal article supplement (PMC4590328)

SUPPLEMENTARY DATA

TABLE S1. The history of land use in the area of sampled patches. Aerial photographs were available from seven years in the period of 1938-1993, enabling a determination of historic landuse (forest, agricultural, open roadside, agricultural roadside, or residential) over the 73 years preceeding the current study (2010 – 2011). Current patch sizes vary from 0.18 – 2.87 ha.

| Year               | POR           | HDP           | TRL           | MWS           | MOR           | BDR                   |
|--------------------|---------------|---------------|---------------|---------------|---------------|-----------------------|
| 1938               | Open roadside | Agricultural  | Agricultural  | Residential   | Open roadside | Agricultural          |
| 1944               | Open roadside | Agricultural  | Agricultural  | Residential   | Open roadside | Agricultural          |
| 1955               | Open roadside | Agricultural  | Open roadside | Residential   | Open roadside | Agricultural roadside |
| 1967               | Open roadside | Forest        | Open roadside | Residential   | Open roadside | Agricultural roadside |
| 1973               | Open roadside | Forest        | Open roadside | Residential   | Open roadside | Agricultural roadside |
| 1980               | Open roadside | Forest        | Open roadside | Open roadside | Open roadside | Open roadside         |
| 1993               | Open roadside         |
| 2010 – 2011        | Open roadside         |
| Patch size<br>(ha) | 0.82          | 0.18          | 0.35          | 0.29          | 0.54          | 2.87                  |

FIG. S1. The power of the 21 polymorphic allozyme loci to detect distinct multilocus genotypes (a) overall and (b) in each patch. For each number of loci, the number of distinct multilocus genotypes was enumerated for 1000 random samples of all possible combinations of that number of loci. Boxes show the maximum, mean, and minimum number of multilocus genotypes.

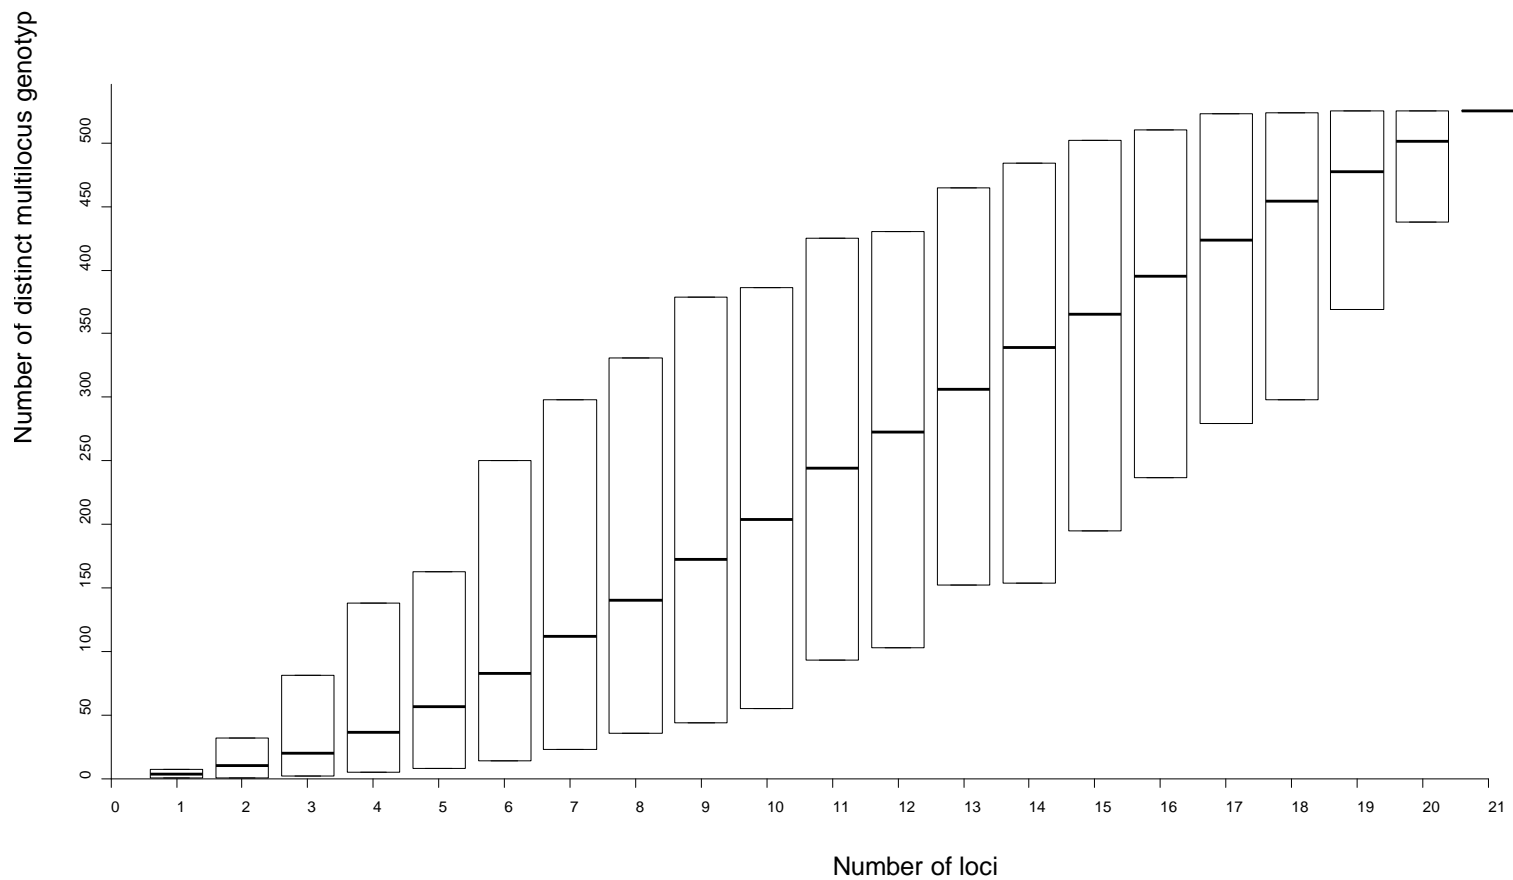

a.



FIG. S2. Distribution of allelic distances separating all unique multilocus genotypes (a) overall and (b) in each patch. The lack of a minor bimodal peak at small allelic distances suggests that somatic mutations and scoring error do not have a major influence on this dataset. Thus, it would not be appropriate to define a threshold for combining distinct multilocus genotypes into closely related multilocus clonal lineages.

a.

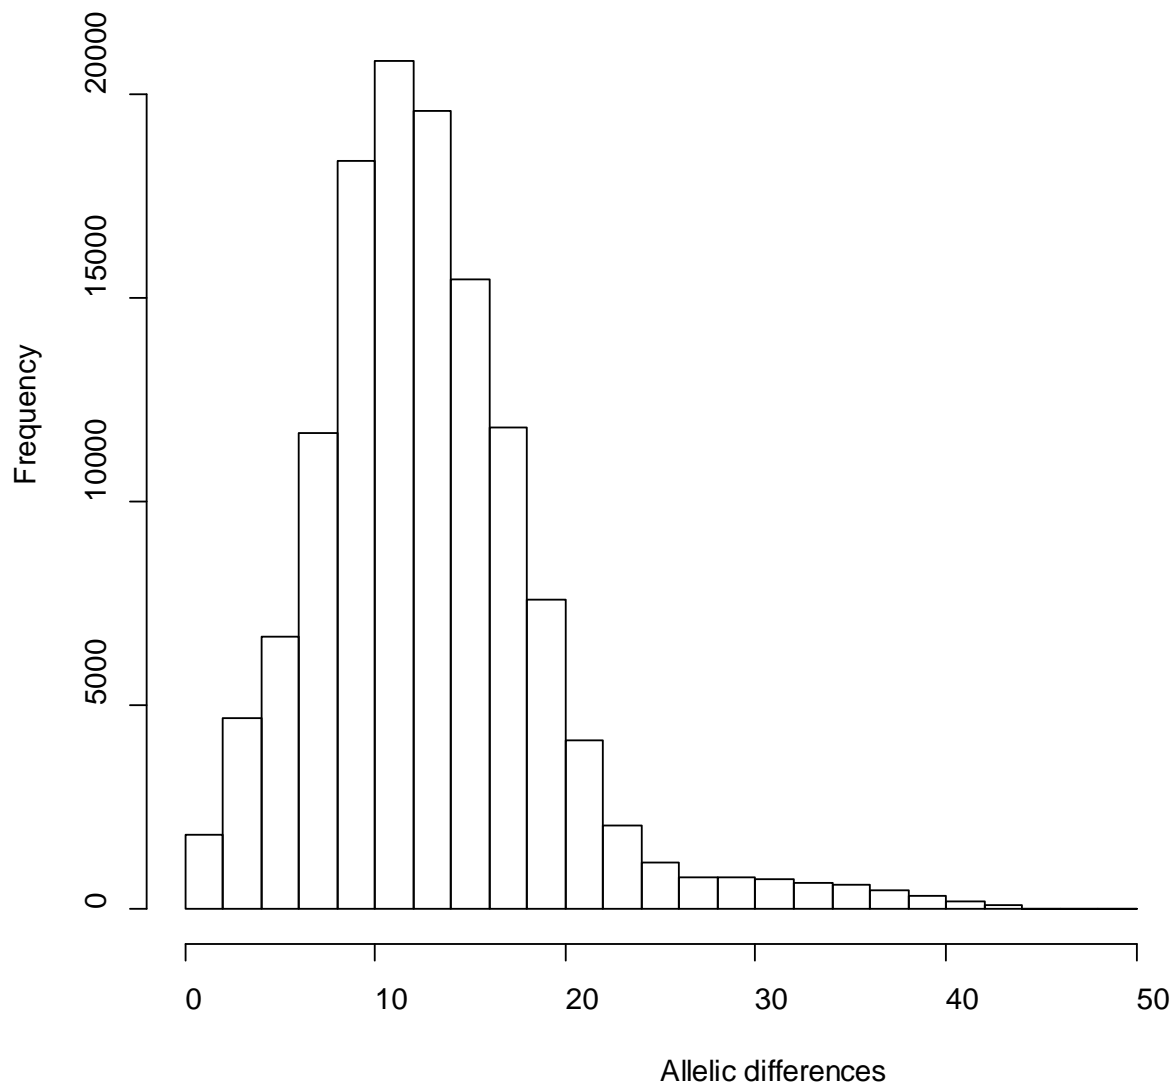

b.

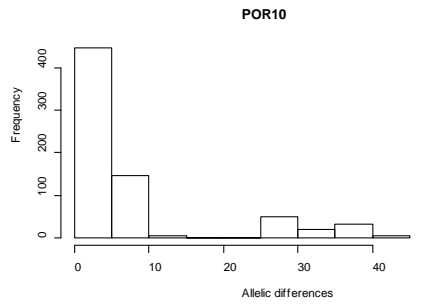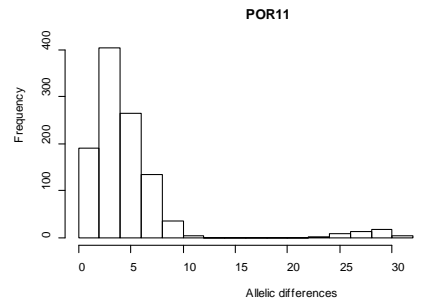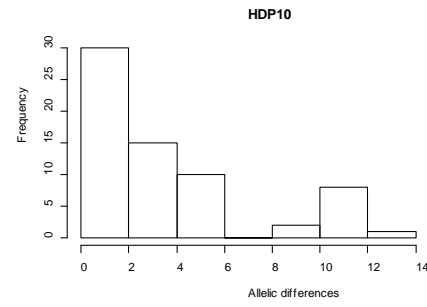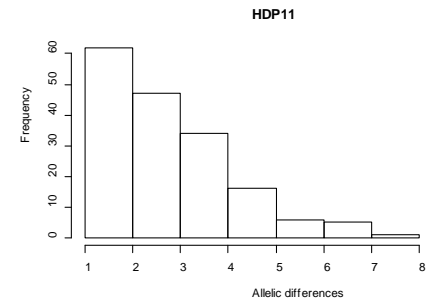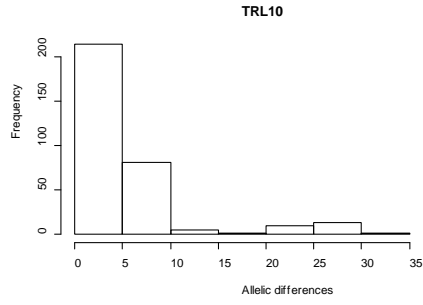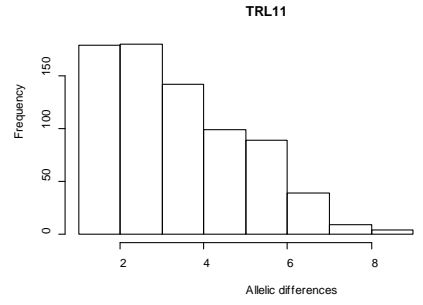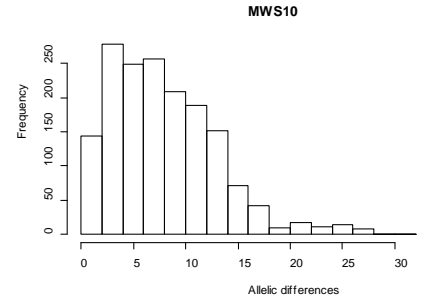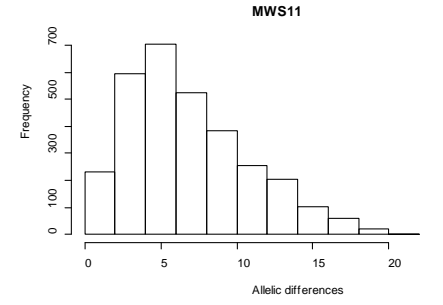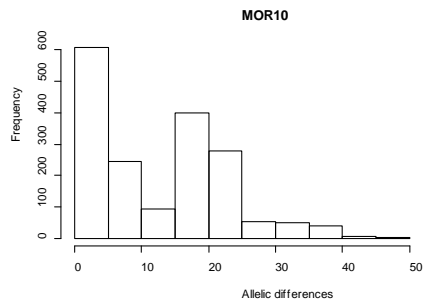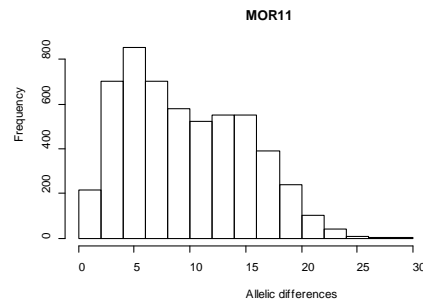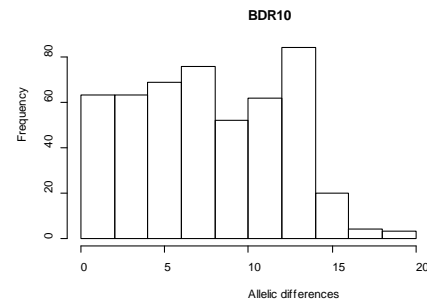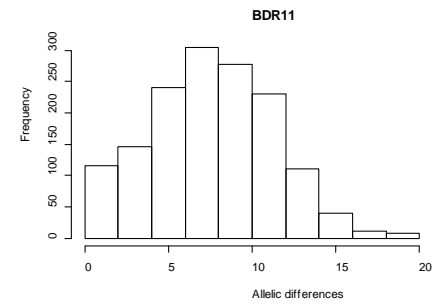

FIG. S3. Maps of clones in all patches. A common alphanumeric naming system is used throughout to allow identification of clones occurring in multiple patches. Genets are shown in boxes collared according to their frequency (red  $\geq 20$  occurrences; purple = 10-19; blue = 2-9; green = 1). Genets that were detected infrequently overall, but which occurred in multiple populations are uniquely colored (frequency listed in parentheses; see Table 2 in main text).

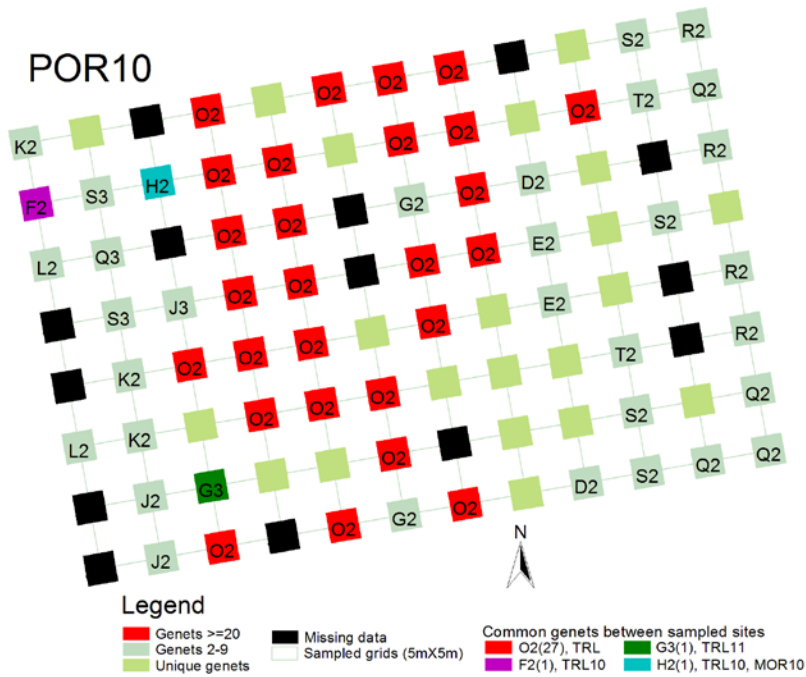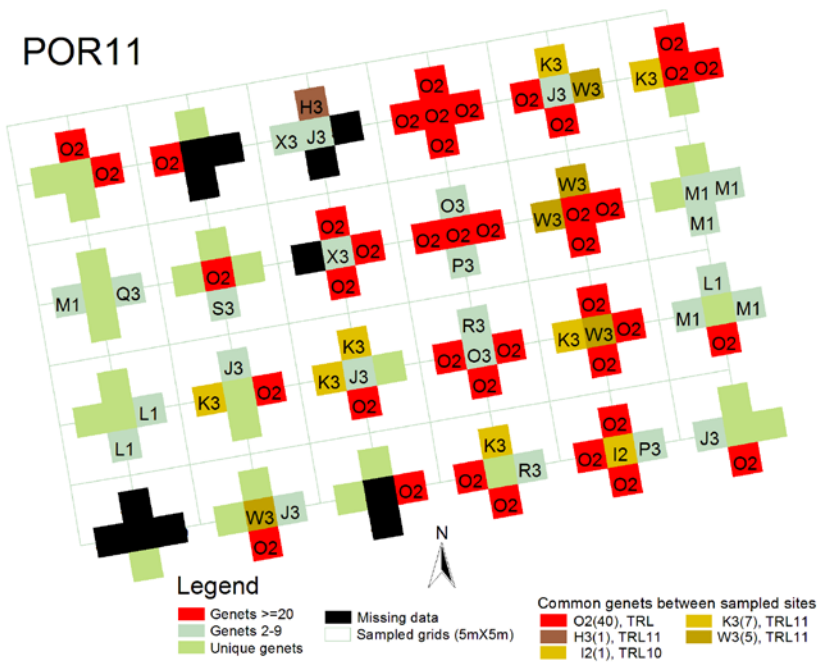

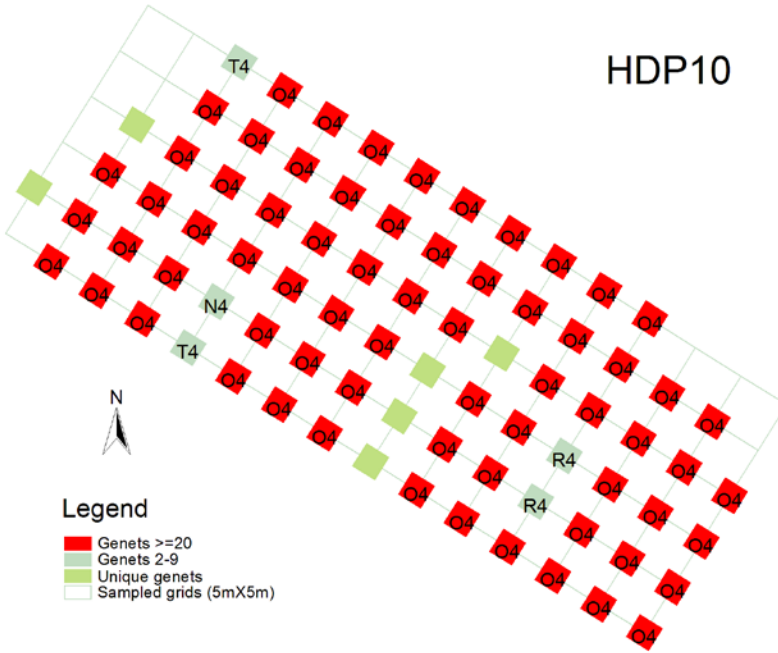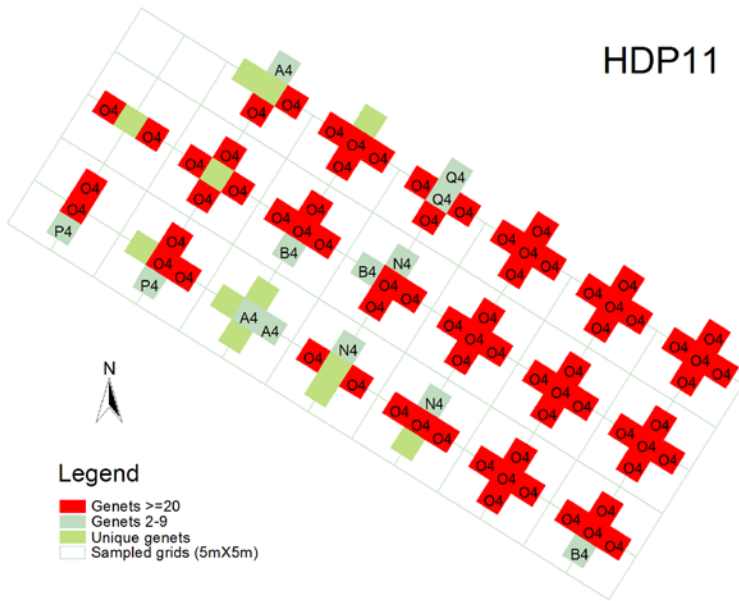

# TRL10

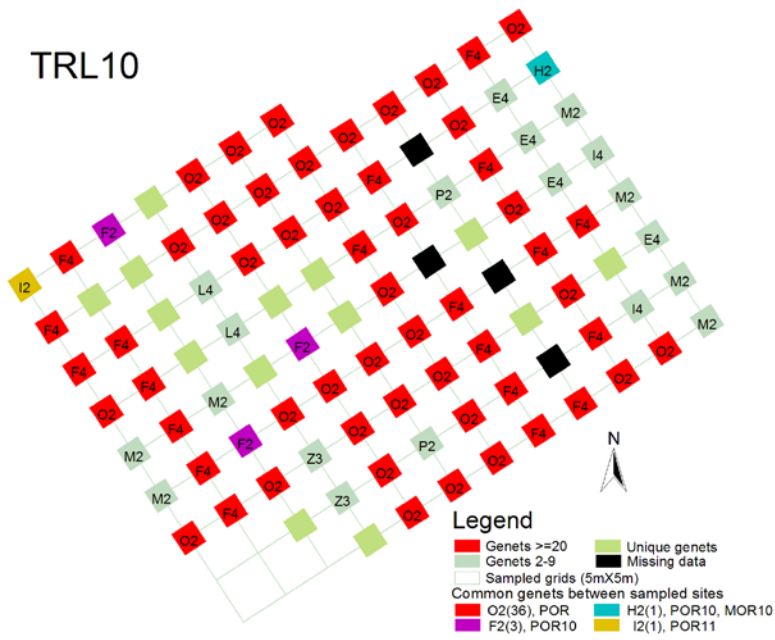

# TRL11

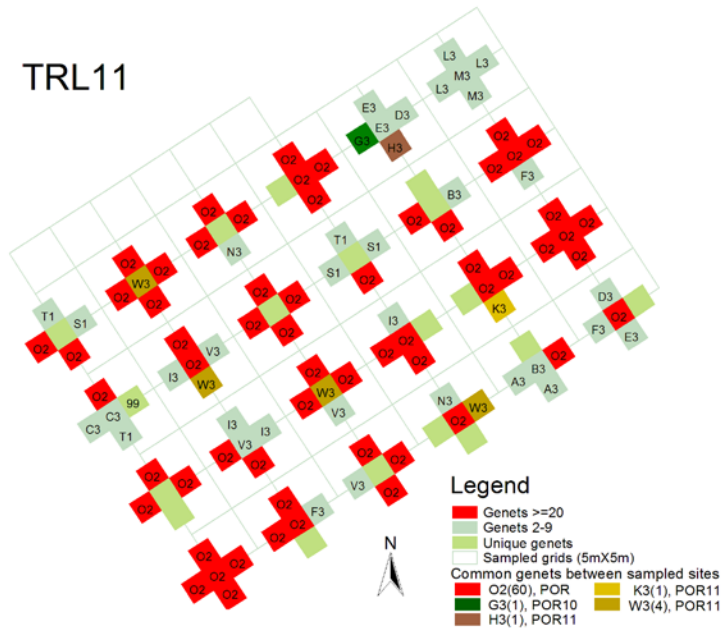



### MWS10

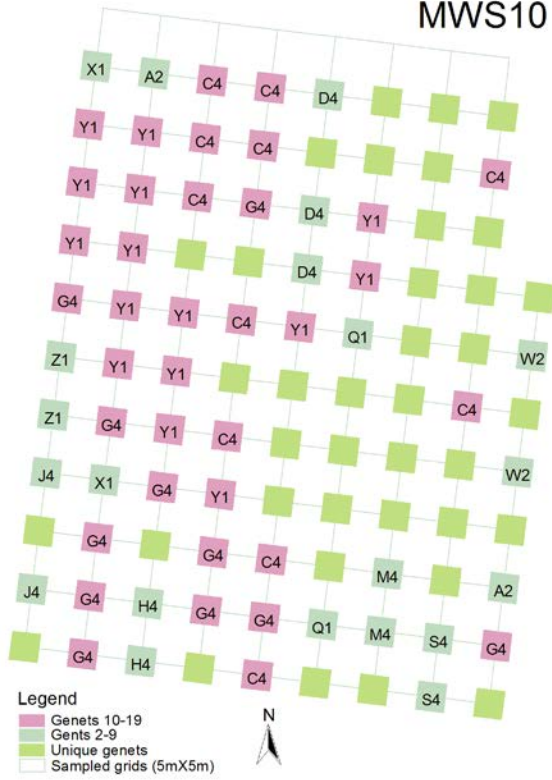

### MWS11

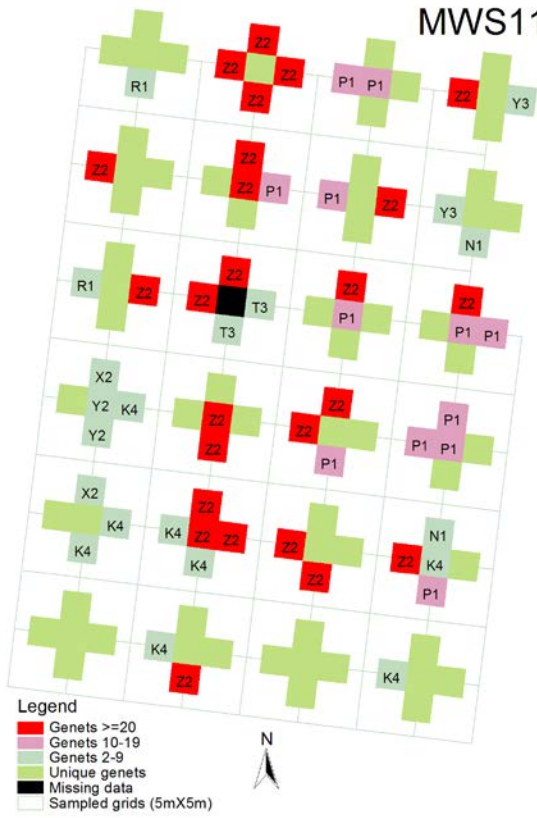

# MOR10

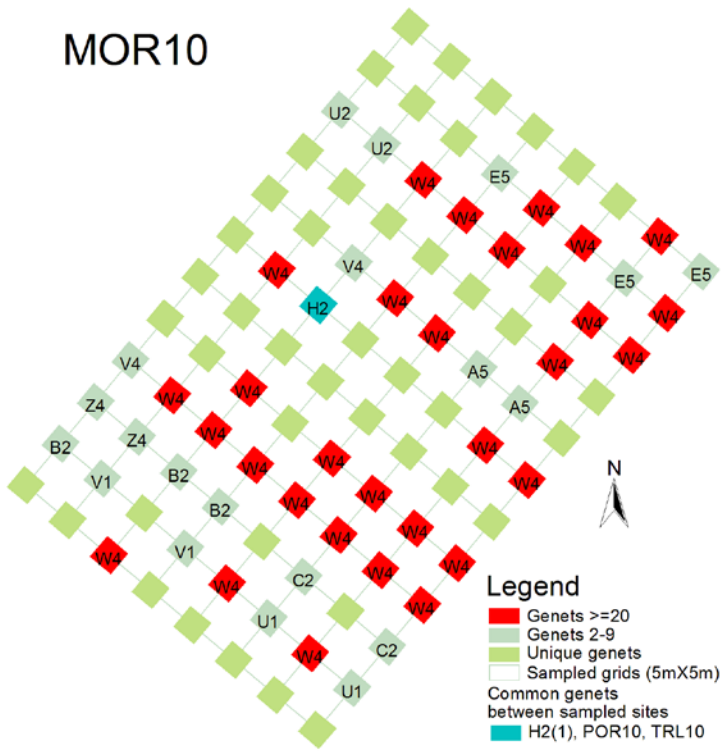

# MOR11

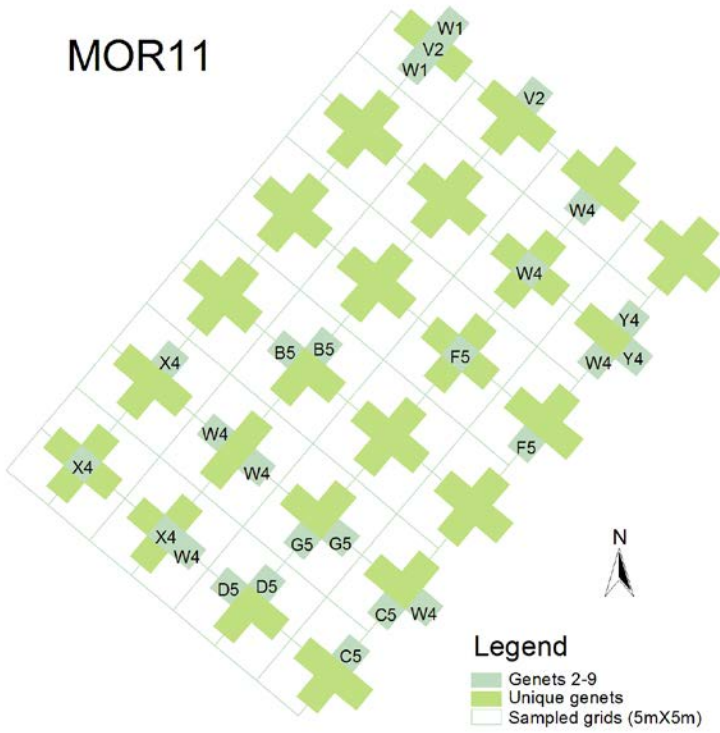

### BDR10

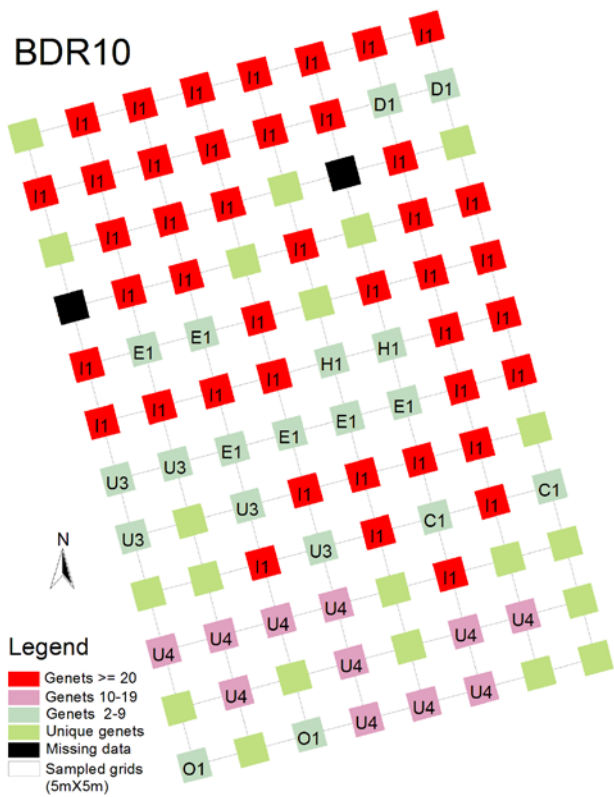

### BDR11

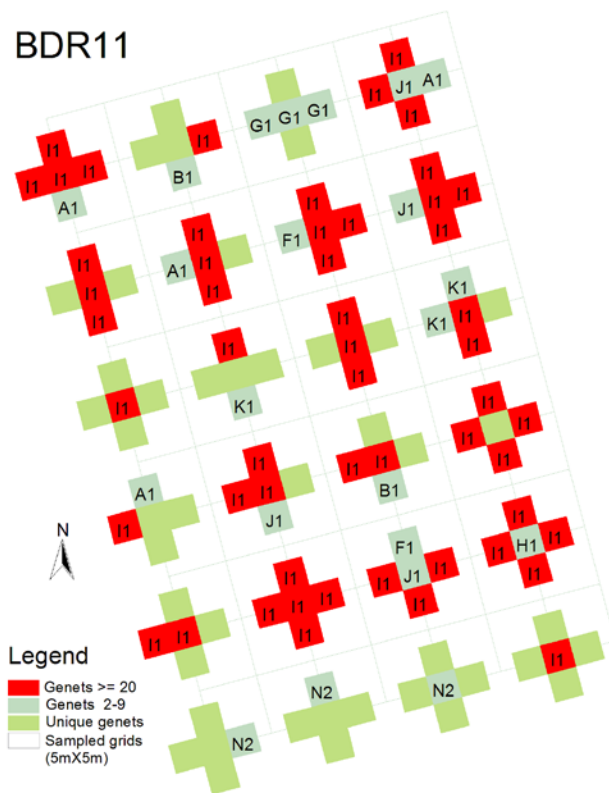

Supplement: supp_mcv117_aob-15047-s01.pdf [file supp_mcv117_aob-15047-s01.pdf]
